# Supplementary material
Source: MDPI journal article supplement (https://www.mdpi.com/2071-1050/14/12/7411)
Supplement: s1 [file s1]

Archive with 3 entries (3 files):
- Supplementary File S1 - Message stimuli and Survey Instrument.pdf
- Supplementary File S2 - Correlation matrix, WTP, and ANCOVA.pdf
- Supplementary File S3 - Pairwise comparisons.pdf
