# Supplementary material
Source: MDPI journal article supplement (https://www.mdpi.com/2071-1050/14/12/7411)
Supplement: s1 [file s1 › Supplementary File S3 - Pairwise comparisons.pdf]

Supplementary File S3

Pairwise Comparisons of All Conditions and Dependent Variables

Table C1  
*Pairwise Comparisons of Adjusted Mean Pro-Policy Attitudes Among Framing Conditions*

| Conditions                   | 1                                                   | 2                                                    | 3                                                    | 4                                                    | 5                                                   | 6     |
|------------------------------|-----------------------------------------------------|------------------------------------------------------|------------------------------------------------------|------------------------------------------------------|-----------------------------------------------------|-------|
| 1. Loss/efficacy-present     | --                                                  |                                                      |                                                      |                                                      |                                                     |       |
| 2. Gain/efficacy-present     | $M_{1-2} = .448$<br>$p = .000$<br>$\eta_p^2 = .015$ | --                                                   |                                                      |                                                      |                                                     |       |
| 3. Non-loss/efficacy-present | $M_{1-3} = .439$<br>$p = .000$<br>$\eta_p^2 = .015$ | $M_{2-3} = -.009$<br>$p = .942$<br>$\eta_p^2 = .000$ | --                                                   |                                                      |                                                     |       |
| 4. Loss/efficacy-absent      | $M_{1-4} = .652$<br>$p = .000$<br>$\eta_p^2 = .032$ | $M_{2-4} = .204$<br>$p = .082$<br>$\eta_p^2 = .003$  | $M_{3-4} = .213$<br>$p = .070$<br>$\eta_p^2 = .004$  | --                                                   |                                                     |       |
| 5. Gain/efficacy-absent      | $M_{1-5} = .424$<br>$p = .000$<br>$\eta_p^2 = .014$ | $M_{2-5} = -.024$<br>$p = .842$<br>$\eta_p^2 = .000$ | $M_{3-5} = -.015$<br>$p = .899$<br>$\eta_p^2 = .000$ | $M_{4-5} = -.228$<br>$p = .052$<br>$\eta_p^2 = .004$ | --                                                  |       |
| 6. Non-loss/efficacy-absent  | $M_{1-6} = .565$<br>$p = .000$<br>$\eta_p^2 = .024$ | $M_{2-6} = .117$<br>$p = .320$<br>$\eta_p^2 = .001$  | $M_{3-6} = .126$<br>$p = .285$<br>$\eta_p^2 = .001$  | $M_{4-6} = -.087$<br>$p = .458$<br>$\eta_p^2 = .001$ | $M_{5-6} = .141$<br>$p = .232$<br>$\eta_p^2 = .002$ | --    |
| <i>M</i>                     | 5.768                                               | 5.320                                                | 5.329                                                | 5.116                                                | 5.344                                               | 5.203 |
| <i>SE</i>                    | .083                                                | .083                                                 | .083                                                 | .082                                                 | .084                                                | .083  |

*Note.* Means are adjusted for political orientation and climate change skepticism covariates.

Table C2  
*Pairwise Comparisons of Adjusted Mean Open-Ended Willingness-to-Pay Among Framing Conditions*

| Conditions                   | 1                                                     | 2                                                     | 3                                                     | 4                                                      | 5                                                   | 6       |
|------------------------------|-------------------------------------------------------|-------------------------------------------------------|-------------------------------------------------------|--------------------------------------------------------|-----------------------------------------------------|---------|
| 1. Loss/efficacy-present     | --                                                    |                                                       |                                                       |                                                        |                                                     |         |
| 2. Gain/efficacy-present     | $M_{1-2} = 36.321$<br>$p = .007$<br>$\eta_p^2 = .008$ | --                                                    |                                                       |                                                        |                                                     |         |
| 3. Non-loss/efficacy-present | $M_{1-3} = 39.485$<br>$p = .003$<br>$\eta_p^2 = .009$ | $M_{2-3} = 3.164$<br>$p = .815$<br>$\eta_p^2 = .000$  | --                                                    |                                                        |                                                     |         |
| 4. Loss/efficacy-absent      | $M_{1-4} = 57.096$<br>$p = .000$<br>$\eta_p^2 = .019$ | $M_{2-4} = 20.775$<br>$p = .122$<br>$\eta_p^2 = .003$ | $M_{3-4} = 17.611$<br>$p = .189$<br>$\eta_p^2 = .002$ | --                                                     |                                                     |         |
| 5. Gain/efficacy-absent      | $M_{1-5} = 42.667$<br>$p = .002$<br>$\eta_p^2 = .011$ | $M_{2-5} = 6.347$<br>$p = .639$<br>$\eta_p^2 = .000$  | $M_{3-5} = 3.183$<br>$p = .814$<br>$\eta_p^2 = .000$  | $M_{4-5} = -14.429$<br>$p = .283$<br>$\eta_p^2 = .001$ | --                                                  |         |
| 6. Non-loss/efficacy-absent  | $M_{1-6} = 43.022$<br>$p = .001$<br>$\eta_p^2 = .011$ | $M_{2-6} = 6.701$<br>$p = .620$<br>$\eta_p^2 = .000$  | $M_{3-6} = 3.537$<br>$p = .793$<br>$\eta_p^2 = .000$  | $M_{4-6} = -14.074$<br>$p = .294$<br>$\eta_p^2 = .001$ | $M_{5-6} = .354$<br>$p = .979$<br>$\eta_p^2 = .000$ | --      |
| <i>M</i>                     | 177.812                                               | 141.491                                               | 138.327                                               | 120.716                                                | 135.145                                             | 134.790 |
| <i>SE</i>                    | 9.495                                                 | 9.528                                                 | 9.533                                                 | 9.430                                                  | 9.558                                               | 9.526   |

*Note.* Means are adjusted for political orientation and climate change skepticism covariates.

Table C3  
*Pairwise Comparisons of Adjusted Mean Dichotomous-Choice Willingness-to-Pay Among Framing Conditions*

| Conditions                   | 1                                                     | 2                                                     | 3                                                     | 4                                                      | 5                                                     | 6      |
|------------------------------|-------------------------------------------------------|-------------------------------------------------------|-------------------------------------------------------|--------------------------------------------------------|-------------------------------------------------------|--------|
| 1. Loss/efficacy-present     | --                                                    |                                                       |                                                       |                                                        |                                                       |        |
| 2. Gain/efficacy-present     | $M_{1-2} = 18.124$<br>$p = .004$<br>$\eta_p^2 = .009$ | --                                                    |                                                       |                                                        |                                                       |        |
| 3. Non-loss/efficacy-present | $M_{1-3} = 21.750$<br>$p = .001$<br>$\eta_p^2 = .013$ | $M_{2-3} = 3.627$<br>$p = .562$<br>$\eta_p^2 = .000$  | --                                                    |                                                        |                                                       |        |
| 4. Loss/efficacy-absent      | $M_{1-4} = 32.000$<br>$p = .000$<br>$\eta_p^2 = .028$ | $M_{2-4} = 13.876$<br>$p = .026$<br>$\eta_p^2 = .005$ | $M_{3-4} = 10.250$<br>$p = .099$<br>$\eta_p^2 = .003$ | --                                                     |                                                       |        |
| 5. Gain/efficacy-absent      | $M_{1-5} = 23.892$<br>$p = .000$<br>$\eta_p^2 = .016$ | $M_{2-5} = 5.768$<br>$p = .357$<br>$\eta_p^2 = .001$  | $M_{3-5} = 2.142$<br>$p = .732$<br>$\eta_p^2 = .000$  | $M_{4-5} = -8.108$<br>$p = .192$<br>$\eta_p^2 = .002$  | --                                                    |        |
| 6. Non-loss/efficacy-absent  | $M_{1-6} = 21.081$<br>$p = .001$<br>$\eta_p^2 = .012$ | $M_{2-6} = 2.957$<br>$p = .636$<br>$\eta_p^2 = .000$  | $M_{3-6} = -.669$<br>$p = .914$<br>$\eta_p^2 = .000$  | $M_{4-6} = -10.919$<br>$p = .079$<br>$\eta_p^2 = .003$ | $M_{5-6} = -2.811$<br>$p = .652$<br>$\eta_p^2 = .000$ | --     |
| <i>M</i>                     | 110.629                                               | 92.505                                                | 88.879                                                | 78.629                                                 | 86.737                                                | 89.548 |
| <i>SE</i>                    | 4.393                                                 | 4.408                                                 | 4.411                                                 | 4.364                                                  | 4.423                                                 | 4.408  |

*Note.* Means are adjusted for political orientation and climate change skepticism covariates.

Table C4  
*Pairwise Comparisons of Adjusted Mean Perceived Threat Among Framing Conditions*

| Conditions                   | 1                                                   | 2                                                    | 3                                                    | 4                                                   | 5                                                    | 6     |
|------------------------------|-----------------------------------------------------|------------------------------------------------------|------------------------------------------------------|-----------------------------------------------------|------------------------------------------------------|-------|
| 1. Loss/efficacy-present     | --                                                  |                                                      |                                                      |                                                     |                                                      |       |
| 2. Gain/efficacy-present     | $M_{1-2} = .480$<br>$p = .000$<br>$\eta_p^2 = .032$ | --                                                   |                                                      |                                                     |                                                      |       |
| 3. Non-loss/efficacy-present | $M_{1-3} = .403$<br>$p = .000$<br>$\eta_p^2 = .022$ | $M_{2-3} = -.077$<br>$p = .381$<br>$\eta_p^2 = .001$ | --                                                   |                                                     |                                                      |       |
| 4. Loss/efficacy-absent      | $M_{1-4} = .116$<br>$p = .182$<br>$\eta_p^2 = .002$ | $M_{2-4} = -.364$<br>$p = .000$<br>$\eta_p^2 = .018$ | $M_{3-4} = -.287$<br>$p = .001$<br>$\eta_p^2 = .012$ | --                                                  |                                                      |       |
| 5. Gain/efficacy-absent      | $M_{1-5} = .411$<br>$p = .000$<br>$\eta_p^2 = .023$ | $M_{2-5} = -.070$<br>$p = .427$<br>$\eta_p^2 = .001$ | $M_{3-5} = .007$<br>$p = .934$<br>$\eta_p^2 = .000$  | $M_{4-5} = .294$<br>$p = .001$<br>$\eta_p^2 = .012$ | --                                                   |       |
| 6. Non-loss/efficacy-absent  | $M_{1-6} = .407$<br>$p = .000$<br>$\eta_p^2 = .023$ | $M_{2-6} = -.073$<br>$p = .406$<br>$\eta_p^2 = .001$ | $M_{3-6} = .004$<br>$p = .963$<br>$\eta_p^2 = .000$  | $M_{4-6} = .291$<br>$p = .001$<br>$\eta_p^2 = .012$ | $M_{5-6} = -.003$<br>$p = .972$<br>$\eta_p^2 = .000$ | --    |
| <i>M</i>                     | 5.986                                               | 5.506                                                | 5.583                                                | 5.870                                               | 5.576                                                | 5.579 |
| <i>SE</i>                    | .062                                                | .062                                                 | .062                                                 | .061                                                | .062                                                 | .062  |

*Note.* Means are adjusted for political orientation and climate change skepticism covariates.

Table C5  
*Pairwise Comparisons of Adjusted Mean Fear Among Framing Conditions*

| Conditions                   | 1                                                    | 2                                                    | 3                                                    | 4                                                   | 5                                                   | 6     |
|------------------------------|------------------------------------------------------|------------------------------------------------------|------------------------------------------------------|-----------------------------------------------------|-----------------------------------------------------|-------|
| 1. Loss/efficacy-present     | --                                                   |                                                      |                                                      |                                                     |                                                     |       |
| 2. Gain/efficacy-present     | $M_{1-2} = .843$<br>$p = .000$<br>$\eta_p^2 = .029$  | --                                                   |                                                      |                                                     |                                                     |       |
| 3. Non-loss/efficacy-present | $M_{1-3} = 1.018$<br>$p = .000$<br>$\eta_p^2 = .041$ | $M_{2-3} = .175$<br>$p = .278$<br>$\eta_p^2 = .001$  | --                                                   |                                                     |                                                     |       |
| 4. Loss/efficacy-absent      | $M_{1-4} = .307$<br>$p = .055$<br>$\eta_p^2 = .004$  | $M_{2-4} = -.535$<br>$p = .001$<br>$\eta_p^2 = .012$ | $M_{3-4} = -.710$<br>$p = .000$<br>$\eta_p^2 = .021$ | --                                                  |                                                     |       |
| 5. Gain/efficacy-absent      | $M_{1-5} = 1.017$<br>$p = .000$<br>$\eta_p^2 = .041$ | $M_{2-5} = .175$<br>$p = .280$<br>$\eta_p^2 = .001$  | $M_{3-5} = -.001$<br>$p = .997$<br>$\eta_p^2 = .000$ | $M_{4-5} = .710$<br>$p = .000$<br>$\eta_p^2 = .021$ | --                                                  |       |
| 6. Non-loss/efficacy-absent  | $M_{1-6} = 1.172$<br>$p = .000$<br>$\eta_p^2 = .054$ | $M_{2-6} = .329$<br>$p = .041$<br>$\eta_p^2 = .004$  | $M_{3-6} = .154$<br>$p = .338$<br>$\eta_p^2 = .001$  | $M_{4-6} = .864$<br>$p = .000$<br>$\eta_p^2 = .031$ | $M_{5-6} = .155$<br>$p = .337$<br>$\eta_p^2 = .001$ | --    |
| <i>M</i>                     | 4.556                                                | 3.713                                                | 3.538                                                | 4.248                                               | 3.539                                               | 3.384 |
| <i>SE</i>                    | .113                                                 | .114                                                 | .114                                                 | .113                                                | .114                                                | .114  |

*Note.* Means are adjusted for political orientation and climate change skepticism covariates.

Table C6  
*Pairwise Comparisons of Adjusted Mean Message Processing Among Framing Conditions*

| Conditions                   | 1                                                   | 2                                                   | 3                                                    | 4                                                   | 5                                                    | 6     |
|------------------------------|-----------------------------------------------------|-----------------------------------------------------|------------------------------------------------------|-----------------------------------------------------|------------------------------------------------------|-------|
| 1. Loss/efficacy-present     | --                                                  |                                                     |                                                      |                                                     |                                                      |       |
| 2. Gain/efficacy-present     | $M_{1-2} = .327$<br>$p = .005$<br>$\eta_p^2 = .009$ | --                                                  |                                                      |                                                     |                                                      |       |
| 3. Non-loss/efficacy-present | $M_{1-3} = .523$<br>$p = .000$<br>$\eta_p^2 = .022$ | $M_{2-3} = .196$<br>$p = .091$<br>$\eta_p^2 = .003$ | --                                                   |                                                     |                                                      |       |
| 4. Loss/efficacy-absent      | $M_{1-4} = .471$<br>$p = .000$<br>$\eta_p^2 = .018$ | $M_{2-4} = .144$<br>$p = .211$<br>$\eta_p^2 = .002$ | $M_{3-4} = -.052$<br>$p = .651$<br>$\eta_p^2 = .000$ | --                                                  |                                                      |       |
| 5. Gain/efficacy-absent      | $M_{1-5} = .687$<br>$p = .000$<br>$\eta_p^2 = .037$ | $M_{2-5} = .360$<br>$p = .002$<br>$\eta_p^2 = .010$ | $M_{3-5} = .164$<br>$p = .159$<br>$\eta_p^2 = .002$  | $M_{4-5} = .216$<br>$p = .062$<br>$\eta_p^2 = .004$ | --                                                   |       |
| 6. Non-loss/efficacy-absent  | $M_{1-6} = .581$<br>$p = .000$<br>$\eta_p^2 = .027$ | $M_{2-6} = .254$<br>$p = .029$<br>$\eta_p^2 = .005$ | $M_{3-6} = .058$<br>$p = .619$<br>$\eta_p^2 = .000$  | $M_{4-6} = .110$<br>$p = .341$<br>$\eta_p^2 = .001$ | $M_{5-6} = -.106$<br>$p = .361$<br>$\eta_p^2 = .001$ | --    |
| <i>M</i>                     | 5.359                                               | 5.032                                               | 4.836                                                | 4.888                                               | 4.672                                                | 4.778 |
| <i>SE</i>                    | .082                                                | .082                                                | .082                                                 | .081                                                | .082                                                 | .082  |

*Note.* Means are adjusted for political orientation and climate change skepticism covariates.

Table C7  
*Pairwise Comparisons of Adjusted Mean Hope Among Framing Conditions*

| Conditions                   | 1                                                    | 2                                                    | 3                                                   | 4                                                    | 5                                                    | 6     |
|------------------------------|------------------------------------------------------|------------------------------------------------------|-----------------------------------------------------|------------------------------------------------------|------------------------------------------------------|-------|
| 1. Loss/efficacy-present     | --                                                   |                                                      |                                                     |                                                      |                                                      |       |
| 2. Gain/efficacy-present     | $M_{1-2} = -.342$<br>$p = .031$<br>$\eta_p^2 = .005$ | --                                                   |                                                     |                                                      |                                                      |       |
| 3. Non-loss/efficacy-present | $M_{1-3} = -.068$<br>$p = .666$<br>$\eta_p^2 = .000$ | $M_{2-3} = .274$<br>$p = .085$<br>$\eta_p^2 = .003$  | --                                                  |                                                      |                                                      |       |
| 4. Loss/efficacy-absent      | $M_{1-4} = .711$<br>$p = .000$<br>$\eta_p^2 = .022$  | $M_{2-4} = 1.053$<br>$p = .000$<br>$\eta_p^2 = .046$ | $M_{3-4} = .779$<br>$p = .000$<br>$\eta_p^2 = .026$ | --                                                   |                                                      |       |
| 5. Gain/efficacy-absent      | $M_{1-5} = .166$<br>$p = .296$<br>$\eta_p^2 = .001$  | $M_{2-5} = .508$<br>$p = .001$<br>$\eta_p^2 = .011$  | $M_{3-5} = .234$<br>$p = .141$<br>$\eta_p^2 = .002$ | $M_{4-5} = -.545$<br>$p = .001$<br>$\eta_p^2 = .013$ | --                                                   |       |
| 6. Non-loss/efficacy-absent  | $M_{1-6} = .090$<br>$p = .569$<br>$\eta_p^2 = .000$  | $M_{2-6} = .432$<br>$p = .007$<br>$\eta_p^2 = .008$  | $M_{3-6} = .158$<br>$p = .318$<br>$\eta_p^2 = .001$ | $M_{4-6} = -.621$<br>$p = .000$<br>$\eta_p^2 = .016$ | $M_{5-6} = -.076$<br>$p = .634$<br>$\eta_p^2 = .000$ | --    |
| <i>M</i>                     | 4.655                                                | 4.997                                                | 4.723                                               | 3.944                                                | 4.489                                                | 4.565 |
| <i>SE</i>                    | .112                                                 | .112                                                 | .112                                                | .111                                                 | .113                                                 | .112  |

*Note.* Means are adjusted for political orientation and climate change skepticism covariates.

Table C8  
*Pairwise Comparisons of Adjusted Mean Perceived Collective Efficacy Among Framing Conditions*

| Conditions                   | 1                                                   | 2                                                   | 3                                                    | 4                                                    | 5                                                   | 6     |
|------------------------------|-----------------------------------------------------|-----------------------------------------------------|------------------------------------------------------|------------------------------------------------------|-----------------------------------------------------|-------|
| 1. Loss/efficacy-present     | --                                                  |                                                     |                                                      |                                                      |                                                     |       |
| 2. Gain/efficacy-present     | $M_{1-2} = .079$<br>$p = .513$<br>$\eta_p^2 = .000$ | --                                                  |                                                      |                                                      |                                                     |       |
| 3. Non-loss/efficacy-present | $M_{1-3} = .171$<br>$p = .161$<br>$\eta_p^2 = .002$ | $M_{2-3} = .091$<br>$p = .455$<br>$\eta_p^2 = .001$ | --                                                   |                                                      |                                                     |       |
| 4. Loss/efficacy-absent      | $M_{1-4} = .465$<br>$p = .000$<br>$\eta_p^2 = .016$ | $M_{2-4} = .385$<br>$p = .002$<br>$\eta_p^2 = .011$ | $M_{3-4} = .294$<br>$p = .015$<br>$\eta_p^2 = .006$  | --                                                   |                                                     |       |
| 5. Gain/efficacy-absent      | $M_{1-5} = .144$<br>$p = .237$<br>$\eta_p^2 = .002$ | $M_{2-5} = .064$<br>$p = .598$<br>$\eta_p^2 = .000$ | $M_{3-5} = -.027$<br>$p = .827$<br>$\eta_p^2 = .000$ | $M_{4-5} = -.321$<br>$p = .008$<br>$\eta_p^2 = .008$ | --                                                  |       |
| 6. Non-loss/efficacy-absent  | $M_{1-6} = .155$<br>$p = .202$<br>$\eta_p^2 = .002$ | $M_{2-6} = .076$<br>$p = .535$<br>$\eta_p^2 = .000$ | $M_{3-6} = -.015$<br>$p = .899$<br>$\eta_p^2 = .000$ | $M_{4-6} = -.310$<br>$p = .011$<br>$\eta_p^2 = .007$ | $M_{5-6} = .011$<br>$p = .927$<br>$\eta_p^2 = .000$ | --    |
| <i>M</i>                     | 4.609                                               | 4.530                                               | 4.439                                                | 4.144                                                | 4.465                                               | 4.454 |
| <i>SE</i>                    | .086                                                | .086                                                | .086                                                 | .085                                                 | .086                                                | .086  |

*Note.* Means are adjusted for political orientation and climate change skepticism covariates.

Table C9  
*Pairwise Comparisons of Adjusted Mean Perceived Message Strength Among Framing Conditions*

| Conditions                   | 1                                                   | 2                                                   | 3                                                    | 4                                                    | 5                                                    | 6     |
|------------------------------|-----------------------------------------------------|-----------------------------------------------------|------------------------------------------------------|------------------------------------------------------|------------------------------------------------------|-------|
| 1. Loss/efficacy-present     | --                                                  |                                                     |                                                      |                                                      |                                                      |       |
| 2. Gain/efficacy-present     | $M_{1-2} = .317$<br>$p = .006$<br>$\eta_p^2 = .008$ | --                                                  |                                                      |                                                      |                                                      |       |
| 3. Non-loss/efficacy-present | $M_{1-3} = .470$<br>$p = .000$<br>$\eta_p^2 = .017$ | $M_{2-3} = .153$<br>$p = .189$<br>$\eta_p^2 = .002$ | --                                                   |                                                      |                                                      |       |
| 4. Loss/efficacy-absent      | $M_{1-4} = .768$<br>$p = .000$<br>$\eta_p^2 = .046$ | $M_{2-4} = .451$<br>$p = .000$<br>$\eta_p^2 = .016$ | $M_{3-4} = .298$<br>$p = .010$<br>$\eta_p^2 = .007$  | --                                                   |                                                      |       |
| 5. Gain/efficacy-absent      | $M_{1-5} = .426$<br>$p = .000$<br>$\eta_p^2 = .014$ | $M_{2-5} = .109$<br>$p = .350$<br>$\eta_p^2 = .001$ | $M_{3-5} = -.044$<br>$p = .703$<br>$\eta_p^2 = .000$ | $M_{4-5} = -.342$<br>$p = .003$<br>$\eta_p^2 = .009$ | --                                                   |       |
| 6. Non-loss/efficacy-absent  | $M_{1-6} = .399$<br>$p = .001$<br>$\eta_p^2 = .013$ | $M_{2-6} = .082$<br>$p = .480$<br>$\eta_p^2 = .001$ | $M_{3-6} = -.071$<br>$p = .541$<br>$\eta_p^2 = .000$ | $M_{4-6} = -.369$<br>$p = .001$<br>$\eta_p^2 = .011$ | $M_{5-6} = -.027$<br>$p = .818$<br>$\eta_p^2 = .000$ | --    |
| <i>M</i>                     | 5.751                                               | 5.433                                               | 5.281                                                | 4.983                                                | 5.325                                                | 5.352 |
| <i>SE</i>                    | .082                                                | .082                                                | .082                                                 | .081                                                 | .082                                                 | .082  |

*Note.* Means are adjusted for political orientation and climate change skepticism covariates.
